# Supplementary material for: Using deep eutectic solvents to improve the resolution of racemic 1-(4-methoxyphenyl)ethanol through Acetobacter sp. CCTCC M209061 cell-mediated asymmetric oxidation
Source: Royal Society of Chemistry journal article supplement (doi:10.1039/c4ra12905a), 2014-12-16
Supplement: c4ra12905a1.pdf [file c4ra12905a1.pdf]

Electronic Supplementary Information (ESI)

**Using deep eutectic solvents to improve resolution of  
racemic 1-(4-methoxyphenyl)ethanol through *Acetobacter*  
sp. CCTCC M209061 cells-mediated asymmetric oxidation**

Pei Xu,<sup>a§</sup> Jing Cheng,<sup>a§</sup> Wen-Yong Lou<sup>\*ab</sup> and Min-Hua Zong<sup>\*b</sup>

<sup>a</sup> *Laboratory of Applied Biocatalysis, College of Light Industry and Food Sciences, South China University of Technology, Guangzhou 510640, China. E-mail: wylou@scut.edu.cn (W.-Y. Lou); Tel.: +86-20-22236669*

<sup>b</sup> *State Key Laboratory of Pulp and Paper Engineering, South China University of Technology, Guangzhou 510640, Guangdong, China. E-mail: btmhzong@scut.edu.cn (M.-H. Zong); Tel: +86-20-87111452*

*§ These authors contributed equally to this work.*

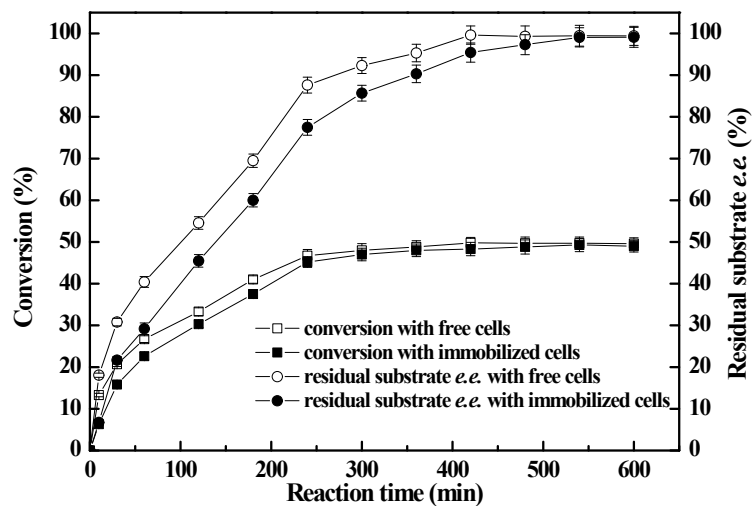

Fig. S1 Time course of asymmetric oxidation of MOPE with free and immobilized *Acetobacter* sp. CCTCC M209061 cells

Reaction conditions: 5.0 mL TEA-HCl buffer (100 mmol/L, pH 6.5), 30 mmol/L MOPE, 0.24 g wet free cells or 1.5 g immobilized cells, 50.0 mmol/L acetone, 30 °C, 200 rpm.

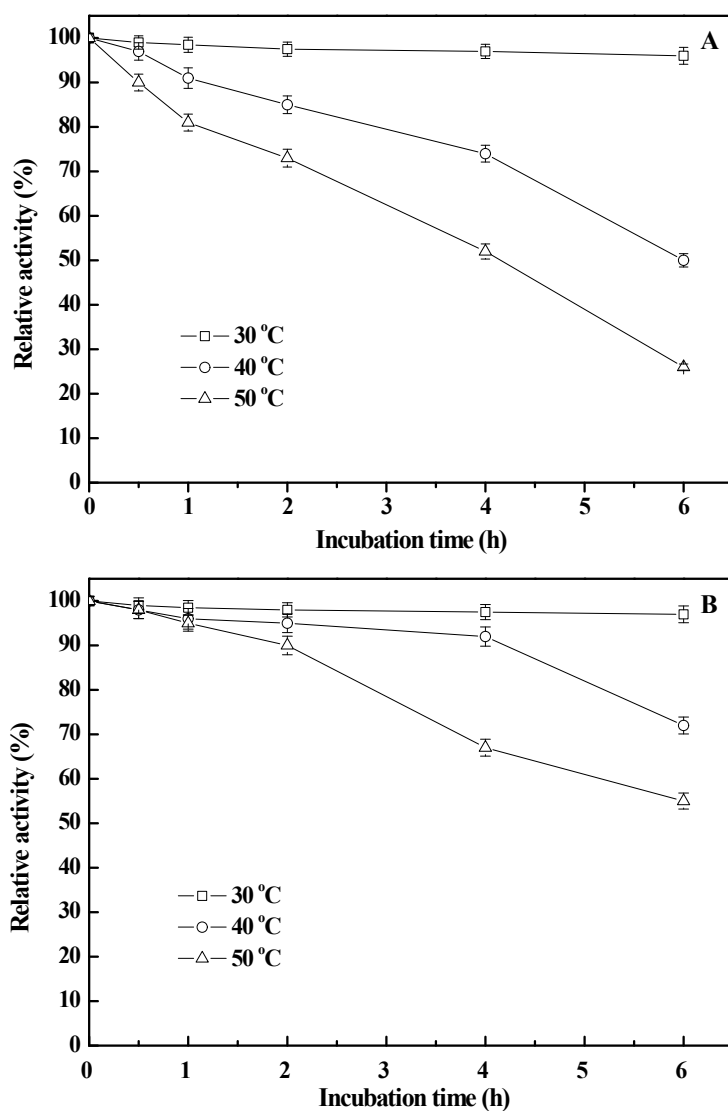

Fig. S2 Thermal stability of free (A) and immobilized (B) *Acetobacter* sp. CCTCC M209061 cells  
 Reaction conditions: 5.0 mL TEA-HCl buffer (100 mmol/L, pH 6.5), 30 mmol/L MOPE, 0.24 g wet free cells or  
 1.5 g immobilized cells, 50.0 mmol/L acetone, 30 °C, 200 rpm, incubation time 6 h.

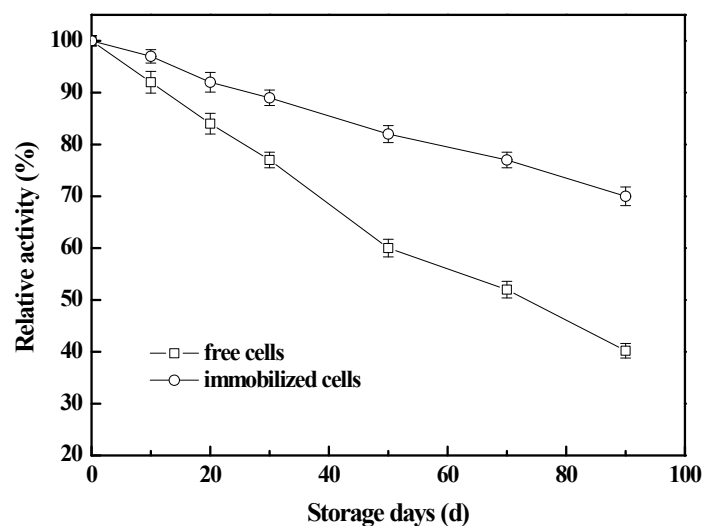

Fig. S3 Storage stability of free and immobilized *Acetobacter* sp. CCTCC M209061 cells at 4 °C  
 Reaction conditions: 5.0 mL TEA-HCl buffer (100 mmol/L, pH 6.5), 30 mmol/L MOPE, 0.24 g wet free cells or 1.5 g immobilized cells, 70.0 mmol/L acetone, 30 °C, 180 rpm.

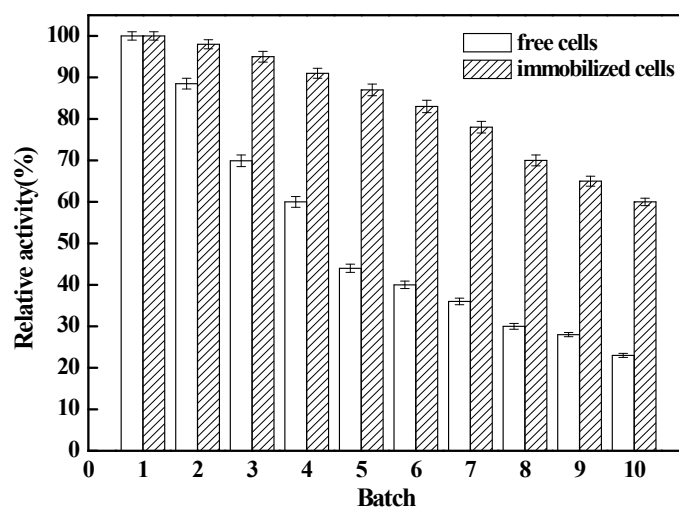

Fig. S4 Operational stability of free and immobilized *Acetobacter* sp. CCTCC M209061 cells.  
 Reaction conditions: 5.0 mL TEA-HCl buffer (100 mmol/L, pH 6.5), 30 mmol/L MOPE, 0.24 g wet free cells or 1.5 g immobilized cells, 50.0 mmol/L acetone, 30 °C, 200 rpm, reaction time 2 h per batch

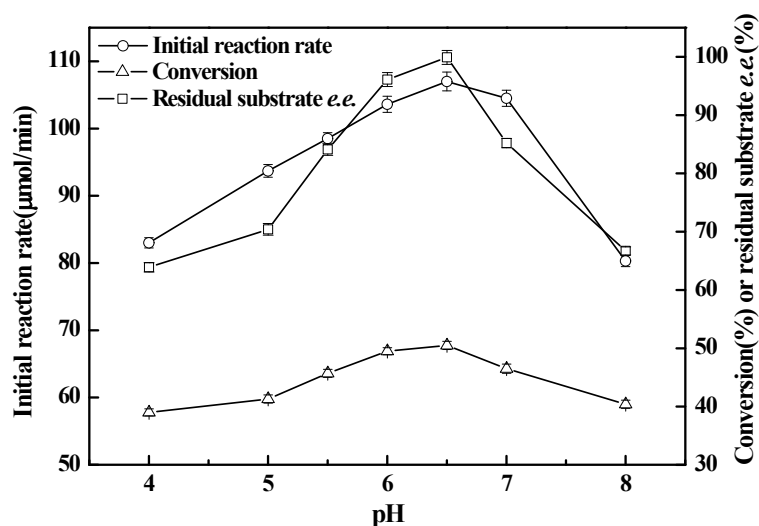

Fig. S5 Effect of buffer pH on the asymmetric oxidation of racemic MOPE with immobilized *Acetobacter* sp. CCTCC M209061 cells

Reaction conditions: 40 mmol/L MOPE, 5 mL TEA-HCl buffer (100 mmol/L, various pHs) containing 10% [ChCl][Gly], 60 mmol/L acetone, 0.3 g/mL immobilized cells, 30 °C, 200 rpm, incubation time 7h.

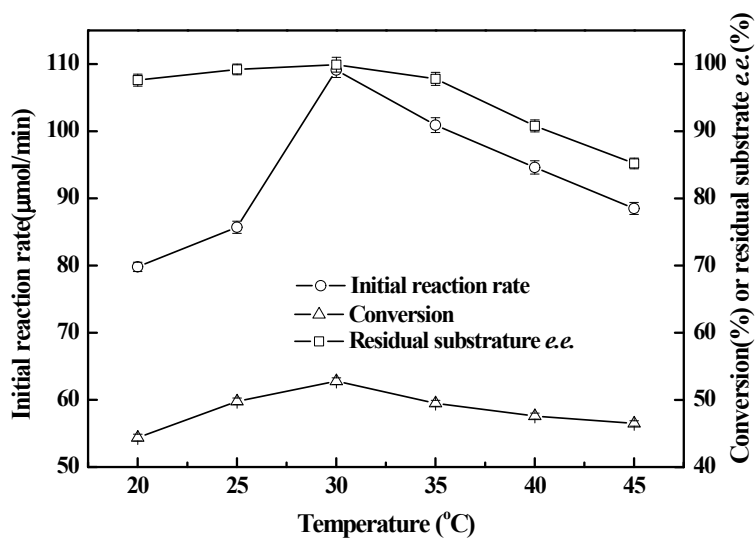

Fig. S6 Effect of temperature on the asymmetric oxidation of racemic MOPE with immobilized *Acetobacter* sp. CCTCC M209061 cells

Reaction conditions: 40 mmol/L MOPE, 5 mL TEA-HCl buffer (100 mmol/L, pH 6.5) containing 10% [ChCl][Gly], 60 mmol/L acetone, 0.3 g/mL immobilized cells, various reaction temperatures, 200 rpm, incubation time 7h.

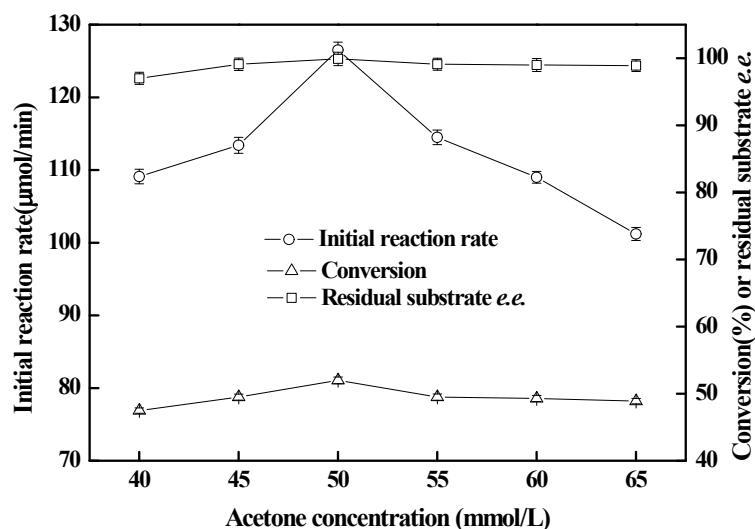

Fig. S7 Effect of acetone concentration on the asymmetric oxidation of racemic MOPE with immobilized *Acetobacter* sp. CCTCC M209061 cells  
 Reaction conditions: 40 mmol/L MOPE, 5 mL TEA-HCl buffer (100 mmol/L, pH 6.5) containing 10% [ChCl][Gly], various acetone concentrations, 0.3 g/mL immobilized cells, 30 °C, 200 rpm, incubation time 7h.

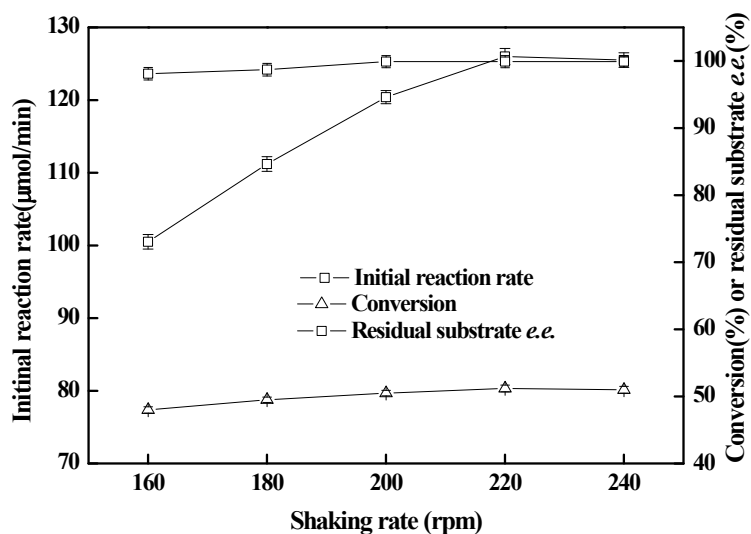

Fig. S8 Effect of shaking rate on the asymmetric oxidation of racemic MOPE with immobilized *Acetobacter* sp. CCTCC M209061 cells  
 Reaction conditions: 40 mmol/L MOPE, 5 mL TEA-HCl buffer (100 mmol/L, pH 6.5) containing 10% [ChCl][Gly], 50 mM acetone, 0.3 g/mL immobilized cells, 30 °C, various shaking rates.
